# Supplementary material for: Fc-Mediated E2-Dimer Subunit Vaccines of Atypical Porcine Pestivirus Induce Efficient Humoral and Cellular Immune Responses in Piglets
Source: MDPI journal article supplement (doi:10.3390/v13122443), 2021-12-06
Supplement: s1 [file s1]

## Supplementary Materials

# Fc-Mediated E2-Dimer Subunit Vaccines of Atypical Porcine Pestivirus Induce Efficient Humoral and Cellular Immune Responses in Piglets

Xujiao Ren <sup>1,2</sup>, Ping Qian <sup>1,2,3</sup>, Shudan Liu <sup>1,2</sup>, Huanchun Chen <sup>1,2,3</sup> and Xiangmin Li <sup>1,2,3,\*</sup>

<sup>1</sup> State Key Laboratory of Agricultural Microbiology, Huazhong Agricultural University, Wuhan 430070, China; renxujiao92@163.com (X.R.); qianp@mail.hzau.edu.cn (P.Q.); vet2439134082@163.com (S.L.); chenhch@mail.hzau.edu.cn (H.C.)

<sup>2</sup> Laboratory of Animal Virology, College of Veterinary Medicine, Huazhong Agricultural University, Wuhan 430070, China

<sup>3</sup> Key Laboratory of Preventive Veterinary Medicine in Hubei Province, The Cooperative Innovation Center for Sustainable Pig Production, Wuhan 430070, China

\* Correspondence: lixiangmin@mail.hzau.edu.cn; Tel.: +86-27-87282608

**Table S1.** Primers used to amplify APPV E2, E2Fc, and E2ΔFc segments in this study.

| Primers    | Sequence (5' to 3')                                                                                                     | Purpose                                                                                                           |
|------------|-------------------------------------------------------------------------------------------------------------------------|-------------------------------------------------------------------------------------------------------------------|
| pMT-aE2-F  | GTGGAATTC <sup>a</sup> TTCATGCCACAAAAGAG                                                                                | Amplify aE2 gene flanked                                                                                          |
| pMT-aE2-R  | GACCTCGAG <sup>b</sup> TCAGTGATGGTGATGGTGATG <sup>c</sup> AGAGCC<br>CGATC <sup>d</sup> CATGACGGTACATCGTTG               | with <i>EcoR</i> I and <i>Xho</i> I, and<br>containing 6×His tag                                                  |
| aE2-Fc'-R  | GAGCCACCTCCTCCGGACCCACCCCCGCCTGATCCATG<br>ACGGTACATCGTTGCAG                                                             | Amplify fragment<br>aE2-Fc' containing the 5'<br>end of IgG3Fc                                                    |
| aE2'-Fc-F  | TGCCTACCGTCTCATCCGCTGCAACGATGTACCGTCATG<br>GATCAGGCGGGGGTGGGTC                                                          | Amplify fragments aE2'-<br>Fc and aE2'-ΔFc<br>containing the 3' end of<br>aE2 gene                                |
| pMT-Fc-R   | GACCTCGAG <sup>b</sup> TCAGTGATGGTGATGGTGATG <sup>c</sup> AGAGCC<br>CGATCC <sup>d</sup> TTTACCCTGAGTCTTGG               | Amplify fragments aE2Fc<br>and aE2ΔFc flanked with<br><i>EcoR</i> I and <i>Xho</i> I, and<br>containing 6×His tag |
| pCAG-aE2-F | AAAGAATTC <sup>a</sup> TCGTGCCACAAAAGACAAGAC                                                                            | Amplify the full-length<br>glycoprotein E2 gene                                                                   |
| pCAG-aE2-R | GTAGCGGCCGC <sup>e</sup> CTAGTGATGGTGATGGTGATG <sup>c</sup> AGAG<br>CCC <sup>d</sup> GATCC <sup>d</sup> ACTAGCTTCCACCTG | flanked with <i>EcoR</i> I and<br><i>Not</i> I, and containing<br>6×His tag                                       |

a: Restriction site for *EcoR* I.b: Restriction site for *Xho* I.

c: 6×His tag sequences in bold.

d: GS Linker sequences are shown in italic.

e: Restriction site for *Not* I.
